# Supplementary material for: Solvent-tuned charge-transfer properties of chiral Pt(ii) complex and TCNQ˙− anion adducts
Source: Royal Society of Chemistry journal article supplement (doi:10.1039/c8ra01330f), 2018-01-01
Supplement: c8ra01330f1.pdf [file c8ra01330f1.pdf]

## Supporting information

# Solvent-tuned charge-transfer properties between chiral Pt(II) complexes and TCNQ<sup>•-</sup> anion

*Xiao-Peng Zhang,<sup>\*a</sup> Li-Li Wang,<sup>a</sup> Da-Shuai Zhang,<sup>a</sup> Xiao-Wei Qi,<sup>a</sup> Zai-Feng Shi<sup>\*a</sup>  
and Qiang Lin<sup>a</sup>*

<sup>a</sup> key Laboratory of Water Pollution Treatment & Resource Reuse of Hainan Province,  
College of Chemistry and Chemical Engineering, Hainan Normal University, Haikou  
571158, People's Republic of China, E-mail:zxp\_inorganic@126.com;  
zaifengshi\_hnnu@sina.com; Tel: +86-898-65889422

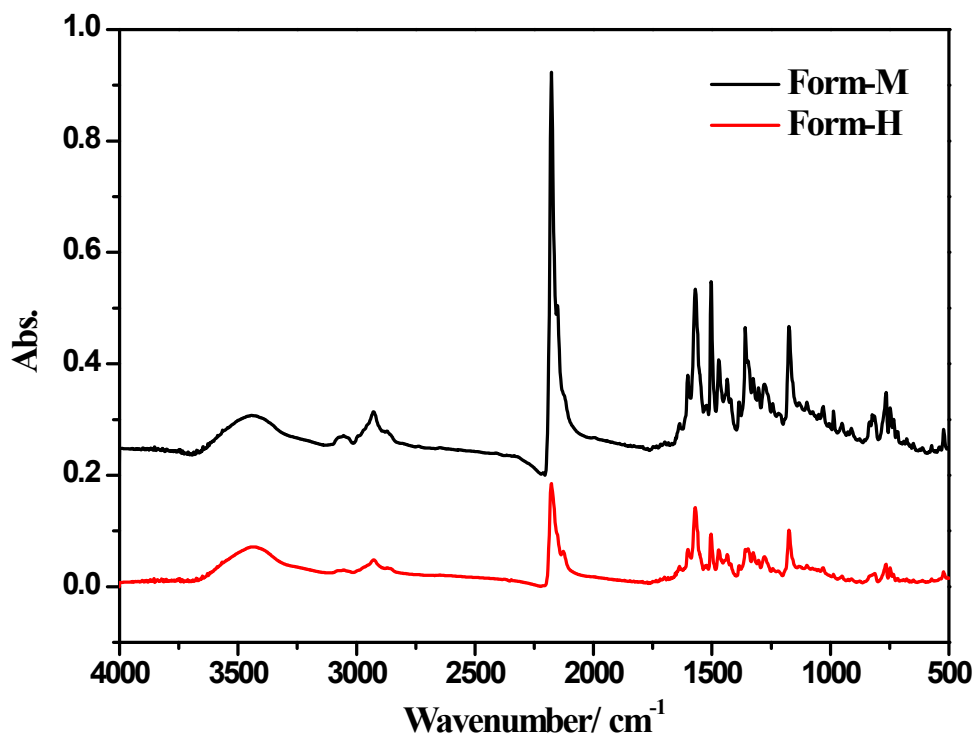

Fig. S1 IR spectra of **Form-M** and **Form-H**.

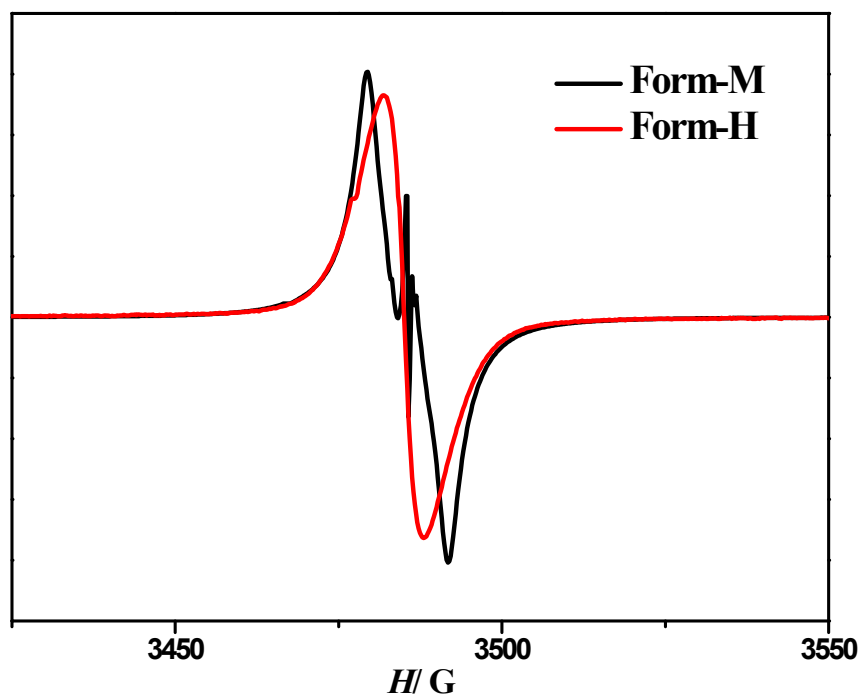

Fig. S2 EPR spectra of **Form-M** and **Form-H**.

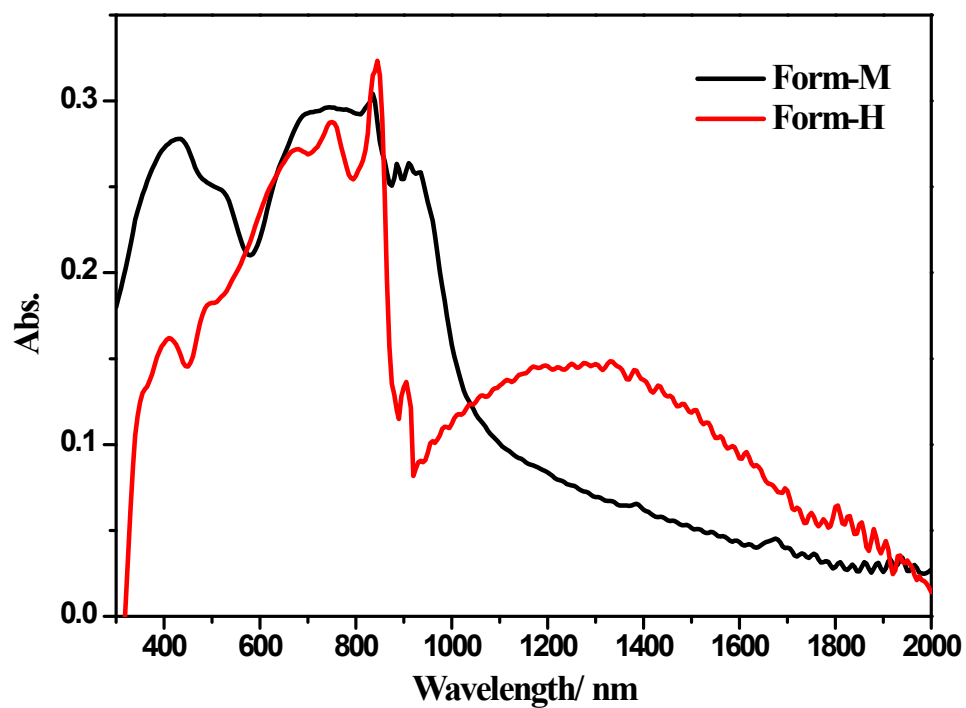

**Fig. S3** Solid-state absorption spectra of **Form-M** and **Form-H**.

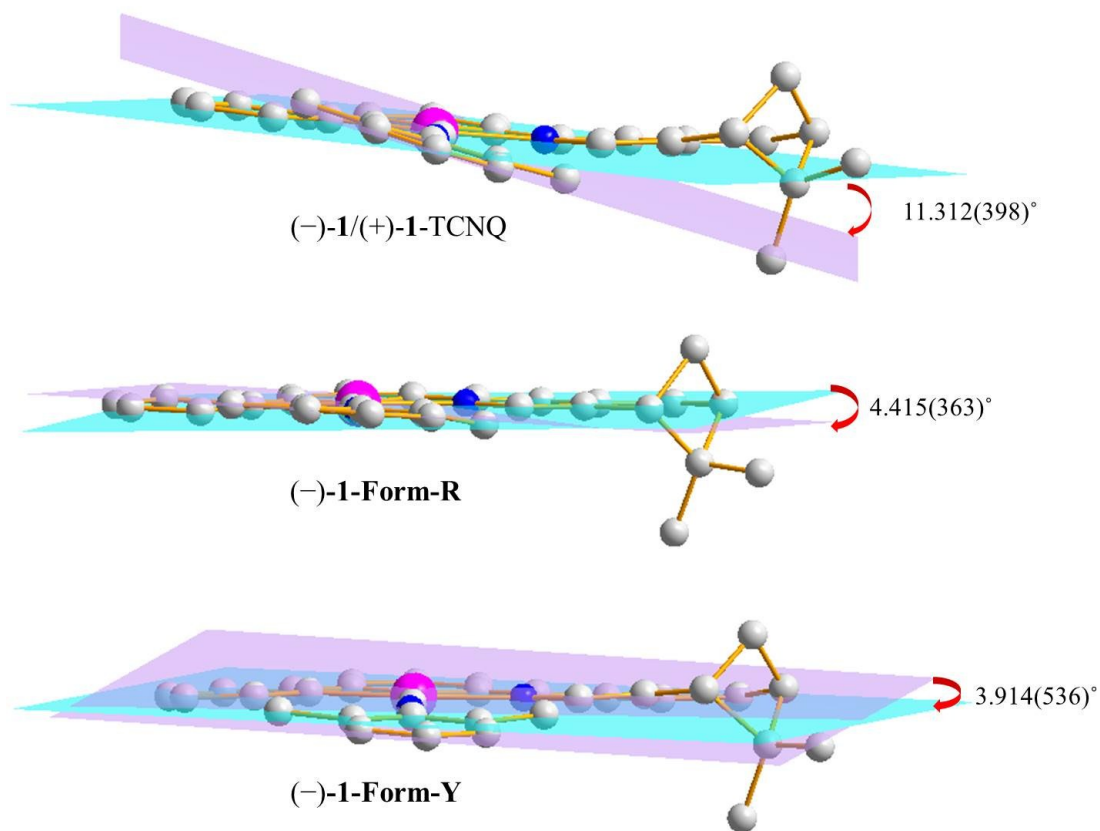

**Fig. S4** Torsion angles between Pt(C<sup>N</sup>N) unit and the moiety of 2,6-dimethylphenyl isocyanide.

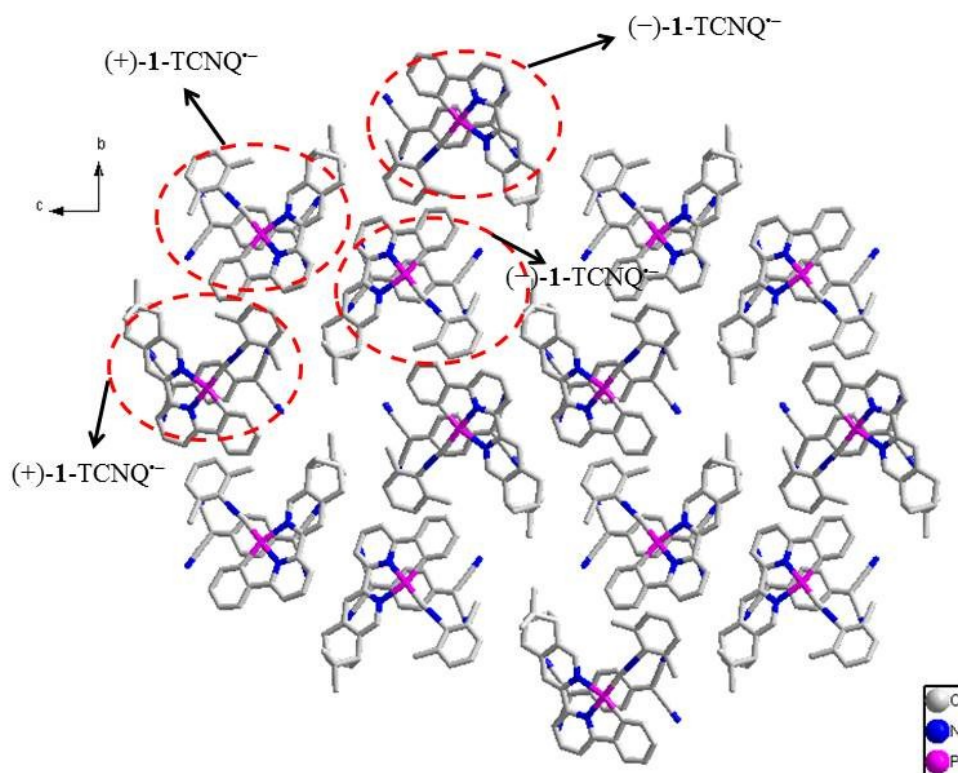

**Fig. S5** Crystal packing diagram of (-)-1/(+)-1-TCNQ in *bc* plane.

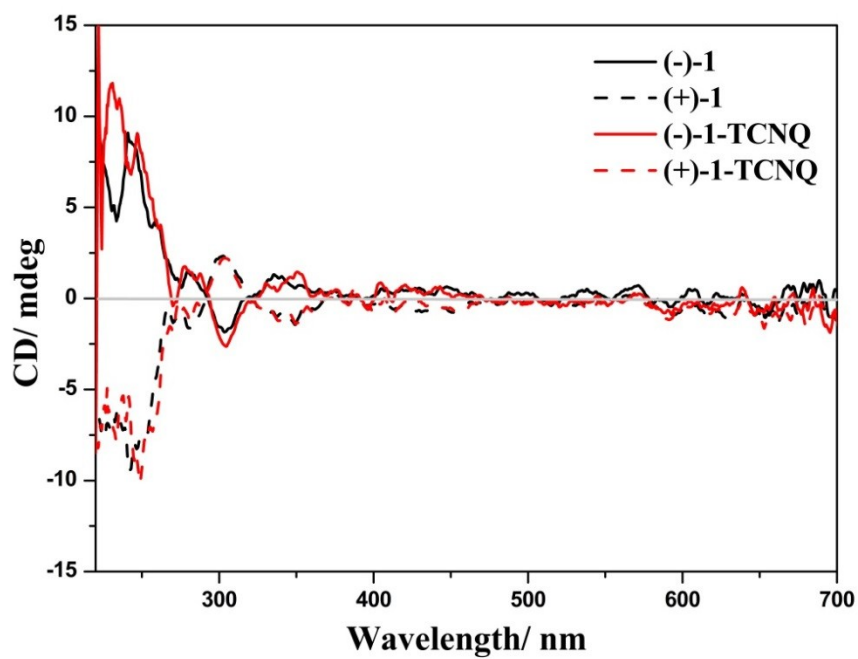

**Fig. S6** ECD spectra of complexes (-)-1, (+)-1, (-)-1-TCNQ and (+)-1-TCNQ in MeOH.

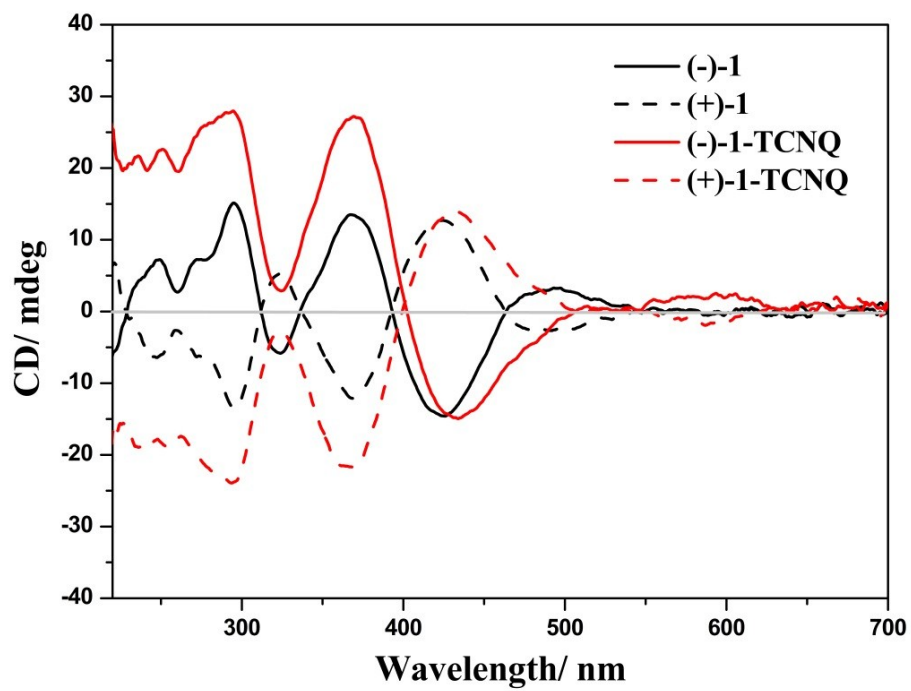

**Fig. S7** ECD spectra of complexes (-)-1, (+)-1, (-)-1-TCNQ and (+)-1-TCNQ in H<sub>2</sub>O.
